# Supplementary material for: Assessment of a NOx Measurement Procedure for Periodic Technical Inspection (PTI) of Light-Duty Diesel Vehicles
Source: MDPI journal article supplement (doi:10.3390/en16145520), 2023-07-21
Supplement: s1 [file s1]

Archive with 1 entries (1 files):
- energies-2490254-supplementary.pdf
